# Supplementary material for: Medium-Chain Fatty Acid Synthesis by “Candidatus Weimeria bifida” gen. nov., sp. nov., and “Candidatus Pseudoramibacter fermentans” sp. nov
Source: PubMed Central journal article supplement (PMC6974650; doi:10.1128/aem.02242-19), 2020-01-21
Supplement: zam003209562s1.pdf [file zam003209562s1.pdf]

1 **SUPPLEMENTAL MATERIAL FOR:**

2

3 **Medium-chain fatty acid synthesis by *Candidatus Weimeria bifida*, gen. nov.,**  
4 **sp. nov., and *Candidatus Pseudoramibacter fermentans*, sp. nov.**

5

6 *Matthew J. Scarborough*<sup>1,2</sup>, *Kevin S. Myers*<sup>1</sup>, *Timothy J. Donohue*<sup>1,3</sup>, and *Daniel R. Noguera*<sup>1,2\*</sup>

7

8 1. The Great Lakes Bioenergy Research Center, UW-Madison, Madison, WI

9 2. The Department of Civil and Environmental Engineering, UW-Madison, Madison, WI

10 3. The Department of Bacteriology, UW-Madison, Madison, WI

11

12

13 \*Corresponding author e-mail: [dnoguera@wisc.edu](mailto:dnoguera@wisc.edu)

14

15 **Table S1.** Summary of metagenome-assembled genomes from MCFA-producing bioreactor

| <b>MAG Name</b>                   | <b>Original Name<sup>1</sup></b> | <b>Relative Abundance<sup>2</sup> (%)</b> | <b>Completeness (%)<sup>3</sup></b> | <b>Contamination (%)<sup>3</sup></b> | <b>Genome size (Mbp)<sup>3</sup></b> | <b>No. scaffolds<sup>3</sup></b> |
|-----------------------------------|----------------------------------|-------------------------------------------|-------------------------------------|--------------------------------------|--------------------------------------|----------------------------------|
| <i>Ca. W. bifida</i> (LCO1.1)     | LCO1                             | 75.3                                      | 96.9 [95.4]                         | 0.5 [0.0]                            | 2.39 [2.10]                          | 10 [44]                          |
| <i>Ca. P. fermentans</i> (EUB1.1) | EUB1                             | 4.7                                       | 99.2 [97.8]                         | 0.2 [0.2]                            | 2.29 [2.00]                          | 29 [35]                          |
| COR1.1                            | COR1                             | 2.4                                       | 95.0 [99.2]                         | 6.7 [0.8]                            | 2.41 [2.51]                          | 82 [225]                         |
| COR3.1                            | COR3                             | 2.8                                       | 98.4 [98.4]                         | 2.4 [7.4]                            | 3.02 [3.65]                          | 134 [533]                        |
| COR4.1 <sup>4</sup>               |                                  | 1.1                                       | 100                                 | 0.7                                  | 2.45                                 | 8                                |
| LAC1.1                            | LAC1                             | 3.8                                       | 99.5 [99.5]                         | 1.1 [1.1]                            | 2.77 [2.63]                          | 9 [18]                           |
| LAC2.1                            | LAC2                             | 2.0                                       | 99.4 [99.4]                         | 1.6 [1.6]                            | 3.18 [3.18]                          | 37 [79]                          |
| LAC4.1                            | LAC4                             | 1.6                                       | 97.7 [98.9]                         | 0.6 [1.3]                            | 3.14 [3.35]                          | 53 [95]                          |
| LAC5.1                            | LAC5                             | 2.5                                       | 99.2 [80.1]                         | 0.0 [0.8]                            | 2.11 [1.48]                          | 6 [181]                          |
| LAC6.1 <sup>4</sup>               |                                  | 1.9                                       | 99.1                                | 1.1                                  | 2.80                                 | 12                               |
| LAC7.1 <sup>4</sup>               |                                  | 2.0                                       | 99.1                                | 2.8                                  | 3.41                                 | 33                               |

16 <sup>1</sup>Names reported in Scarborough et al. (1)

17 <sup>2</sup>Relative abundance based in DNA read mapping normalized to genome size for day 252 sample.

18 <sup>3</sup>Numbers in brackets indicate values for assembled MAGs reported in Scarborough et al. (1)

19 <sup>4</sup>MAGs not assembled in Scarborough et al. (1)

20

21 **Table S2. Free energy of formation values used for thermodynamic calculations.<sup>1</sup>**

| Compound Name         | Formula                                                    | $\Delta G_f$ (kJ mol <sup>-1</sup> ) |    |
|-----------------------|------------------------------------------------------------|--------------------------------------|----|
| Glycerol              | C <sub>3</sub> H <sub>8</sub> O <sub>3</sub>               | -486.09                              | 22 |
| Butyrate              | C <sub>4</sub> H <sub>7</sub> O <sub>2</sub> <sup>-</sup>  | -349.40                              | 24 |
| Hexanoate             | C <sub>6</sub> H <sub>11</sub> O <sub>2</sub> <sup>-</sup> | -335.85                              | 25 |
| Octanoate             | C <sub>8</sub> H <sub>15</sub> O <sub>2</sub> <sup>-</sup> | -322.29                              | 26 |
| Water                 | H <sub>2</sub> O                                           | -237.17                              | 27 |
| Carbon dioxide (aq)   | CO <sub>2</sub>                                            | -386.02                              | 28 |
| Hydrogen ion (pH = 7) | H <sup>+</sup>                                             | -39.87                               | 29 |
| Hydrogen (Gas)        | H <sub>2</sub>                                             | 0                                    | 30 |

31 <sup>1</sup>Free energies of formation ( $\Delta G_f^0$ ) are from Thauer et al. 1977 (2). For octanoate, similar to the  
 32 assumption made by Thauer et al. for hexanoate, each CH<sub>2</sub> group decreases the free energy of  
 33 formation by 8.32 kJ/mol in the butyrate to octanoate series.

34  
 35

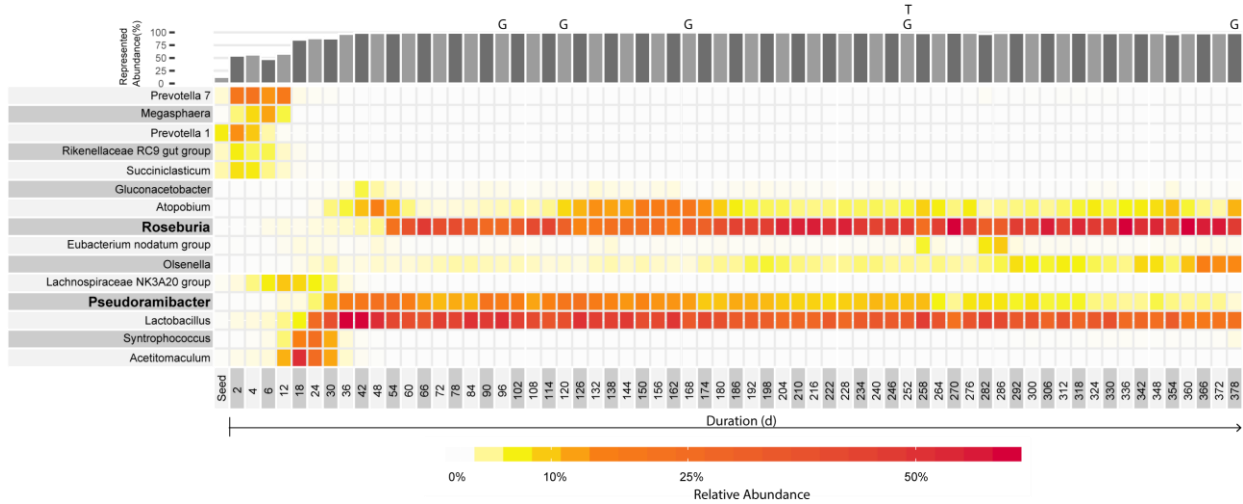

37

38 **Figure S1.** Relative abundance of bacteria in the bioreactor based on 16S rRNA gene amplicon  
 39 sequencing. With the short 16S rRNA gene fragments, *Ca. W. bifida* was classified as a member  
 40 of the *Roseburia* genus, whereas *Ca. P. fermentans* was correctly classified as a member of the  
 41 *Pseudoramibacter* genus. The first column shows results from the acid digester sludge (“seed”) used for  
 42 reactor inoculum. The duration after starting the bioreactor is shown on the x-axis and genera names are  
 43 provided on the y-axis. The bar plot above the heatmap shows the sum of abundance represented in the  
 44 heatmap. Colors in the heatmap indicate relative abundance with higher abundance indicated by red color  
 45 intensity. Samples corresponding to metagenomic and metatranscriptomic samples analyzed in this study  
 46 are shown with “G” indicating a metagenomic sample and “T” indicating the time point used for the  
 47 time-series metatranscriptomic analysis. The 16S-based abundance for the first 252 days was previously  
 48 published in Scarborough et al. 2018 (3).

49

50

51

52

53

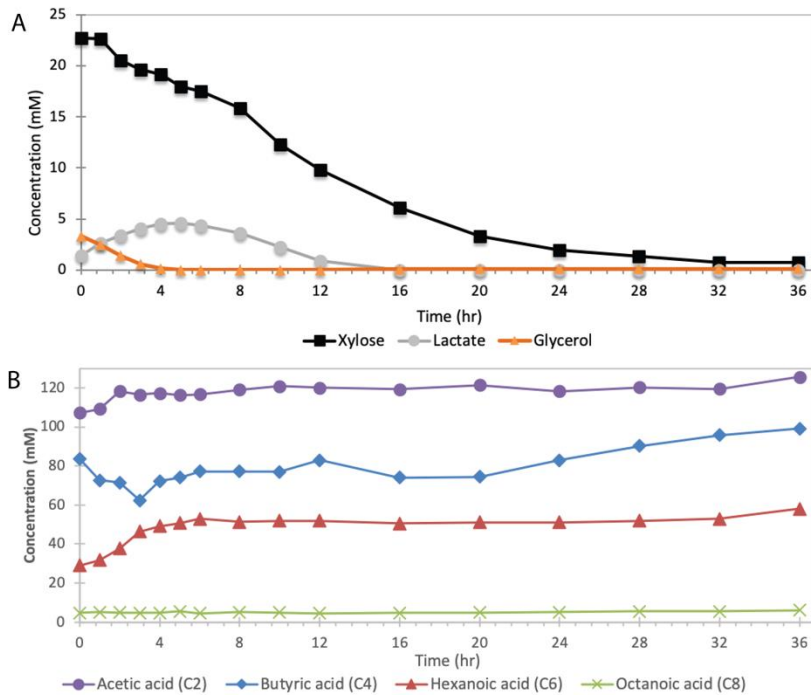

64 **Figure S2.** Extracellular metabolites for 36 hours after addition of lignocellulosic biorefinery  
65 residues. (A) Xylose, lactate, and glycerol are all compounds that are consumed during the course  
66 of the experiment. (B) The reactor produced various carboxylic acid end products, including acetic  
67 acid, butyric acid, hexanoic acid, and octanoic acid.

68

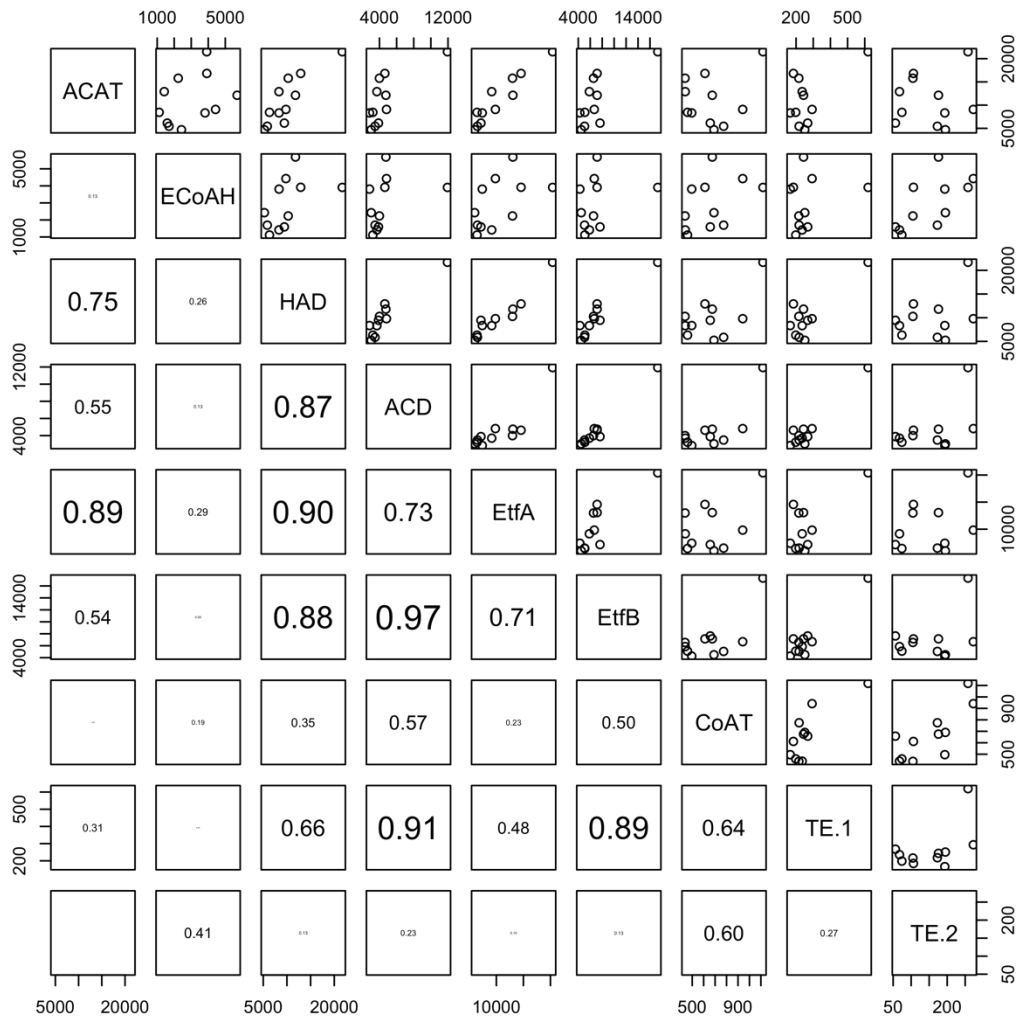

70

71 **Figure S3.** Pairwise comparison of transcript abundance for reverse  $\beta$ -oxidation genes in *Ca. W.*72 *bifida*. Coefficients of determination are shown in bottom-left panels.

73

74

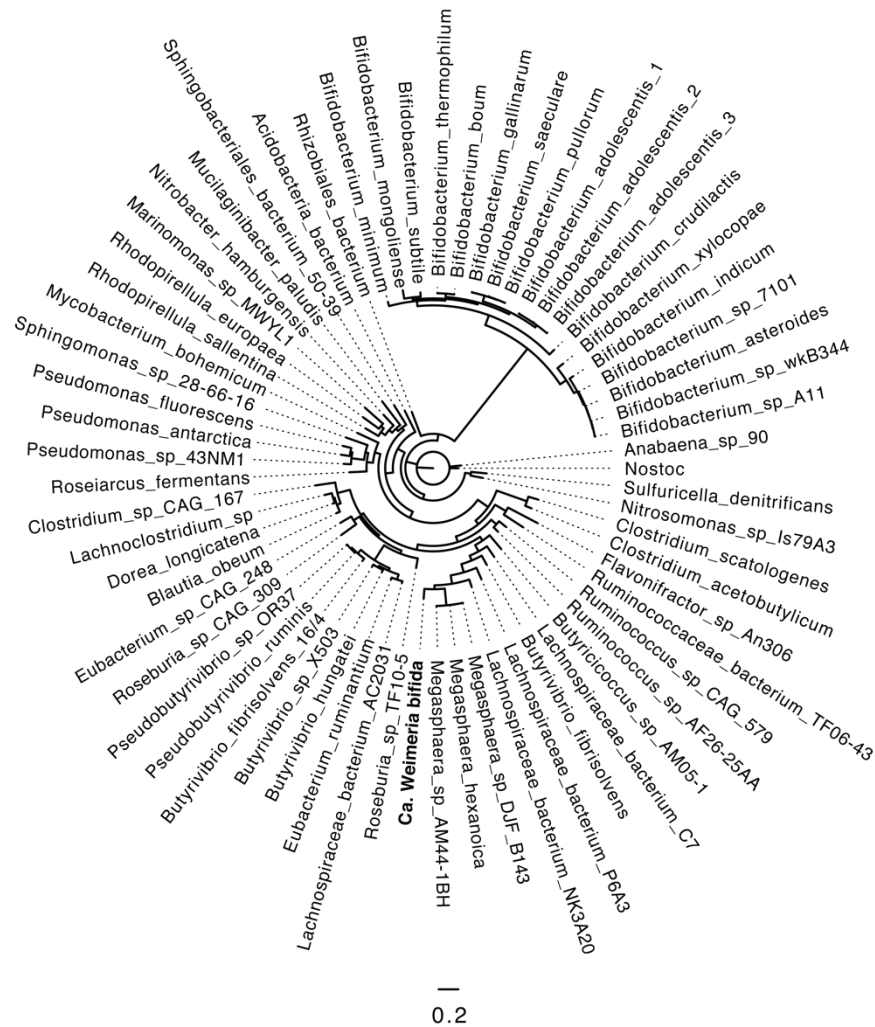

75

76 **Figure S4.** A maximum-likelihood phylogenetic tree of the phosphoketolase enzyme across  
 77 several phyla of bacteria. Sequences across several phyla were selected and show a distinct cluster  
 78 of the amino acid sequences for *Bifidobacterium* species. The sequence from *Ca. W. bifida*  
 79 clustered with those from members of the chain-elongating genus *Megasphaera*.

A

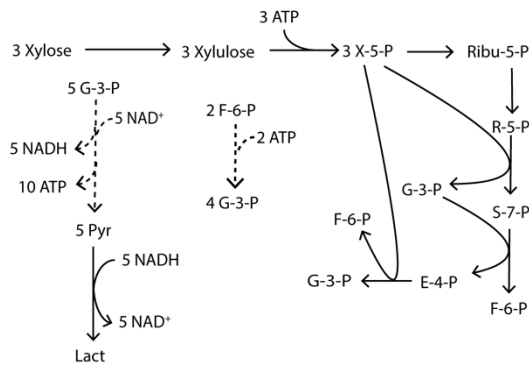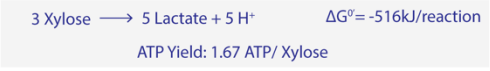

B

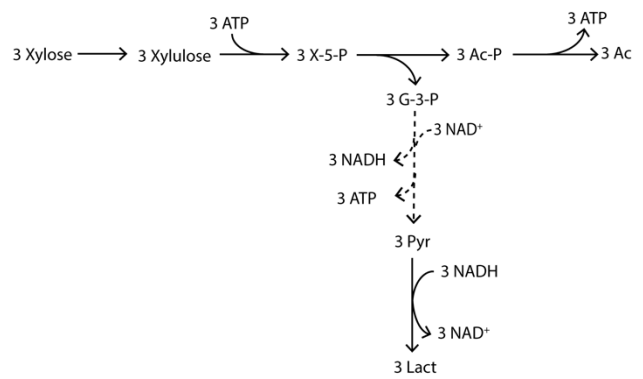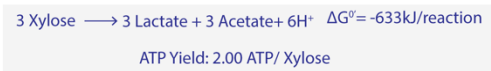

80  
81

82 **Figure S5.** Comparison of ATP yields and thermodynamics with (A) consumption of xylose via  
 83 the pentose phosphate pathway and (B) homolactic acid fermentation with the pentose phosphate  
 84 pathway. Both pathways are described in Tanaka et al. (4).

85



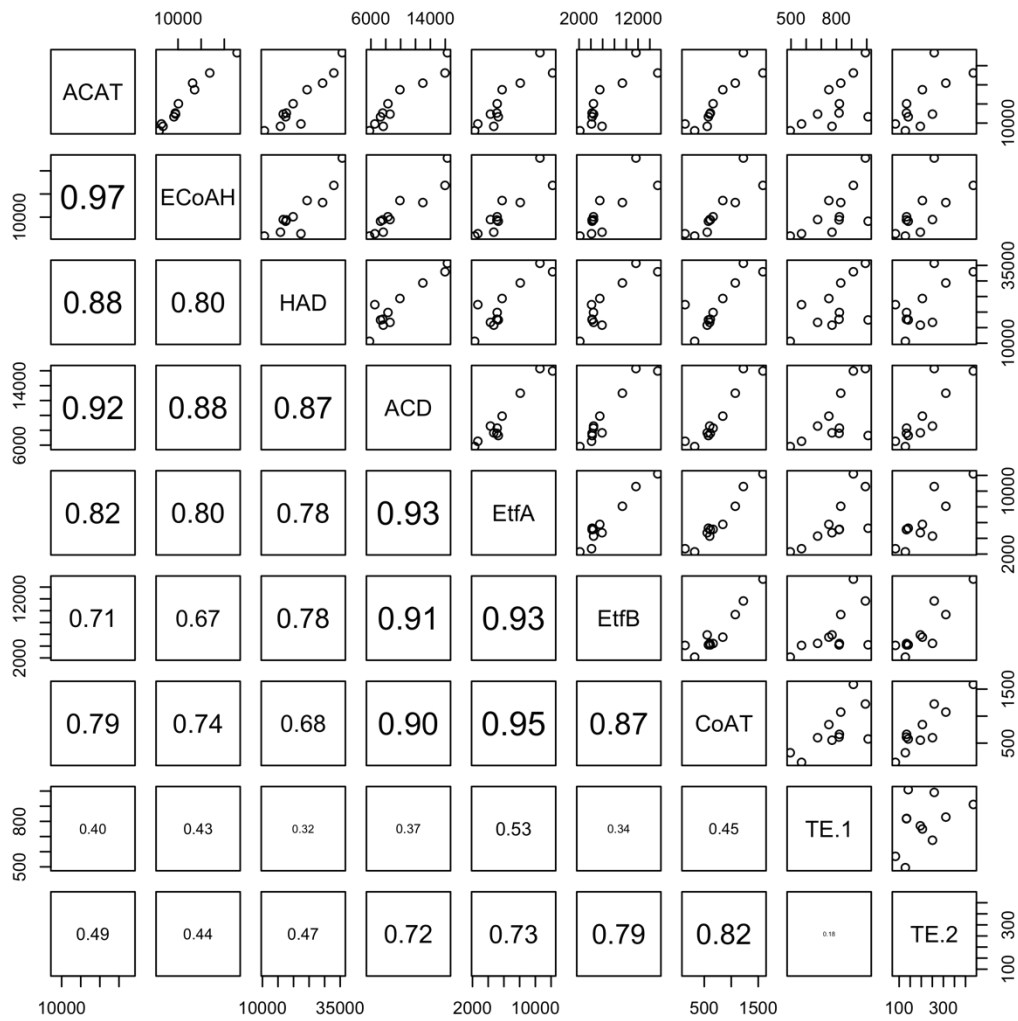

86

87

88 **Figure S6.** Pairwise comparison of transcript abundance for reverse  $\beta$ -oxidation genes in *Ca. P.*

89 fermentans. Coefficients of determination are shown in bottom-left panels.

90

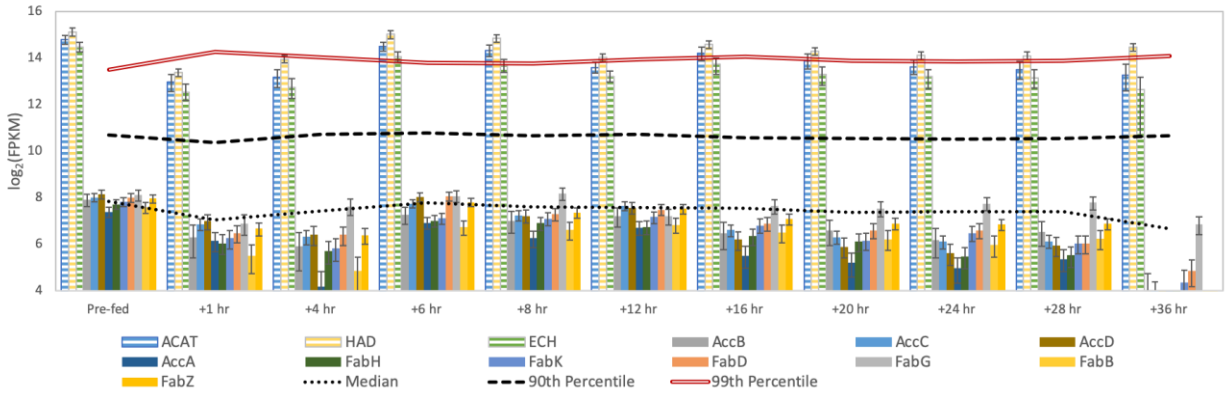

91

92

93 **Figure S7.** Abundance of reverse  $\beta$ -oxidation genes and fatty acid biosynthesis transcripts for *Ca.*  
 94 *P. fermentans*. The genes are ordered as they are predicted to be ordered in the *Ca. P. fermentans*  
 95 genome (**Fig. 3J**).

96

97 **REFERENCES**

98

99 1. Scarborough MJ, Lawson CE, Hamilton JJ, Donohue TJ, Noguera DR. 2018.  
 100 Metatranscriptomic and thermodynamic insights into medium-chain fatty acid production  
 101 using an anaerobic microbiome. *mSystems* doi:0.1128/msystems.00221-18.  
 102 0.1128/msystems.00221-18.

103 2. Thauer RK, Jungermann K, Decker K. 1977. Energy conservation in chemotrophic  
 104 anaerobic bacteria. *Bacteriological Reviews* 41:100-180.

105 3. Scarborough MJ, Lynch G, Dickson M, McGee M, Donohue TJ, Noguera DR. 2018.  
 106 Increasing the economic value of lignocellulosic stillage through medium-chain fatty acid  
 107 production. *Biotechnology for Biofuels* 11:200. 10.1186/s13068-018-1193-x.

108 4. Tanaka K, Komiyama A, Sonomoto K, Ishizaki A, Hall SJ, Stanbury R. 2002. Two  
 109 different pathways for D-xylose metabolism and the effect of xylose concentration on the  
 110 yield coefficient of L-lactate in mixed-acid fermentation by the lactic acid bacterium  
 111 *Lactococcus lactis* 10-1. *Applied Microbiology and Biotechnology* 60:160-167.  
 112 10.1007/s00253-002-1078-5.  
 113
